# Supplementary material
Source: publisher figshare collection journal article supplement (https://gsajournals.figshare.com/ndownloader/files/23777570)
Supplement: Supplementary file 1 [file 23777570]

## Sheet: Sheet1
Table S1. Summary of sequencing statistics for all 35 MA lines and the parent strains
* Data from Dutta et al., 2017
Line	SNP genotyped	Read coverage (X)
RR_P	70963	71.5461
RR_1	71319	55.3041
RR_2	71254	122.772
RR_3	71311	156.451
RR_4	71178	57.0351
RR_5	71248	41.8868
S/R_P	72741	44.9915
S/R_1	72729	47.6847
S/R_2	72502	22.9678
S/R_3	72508	23.5452
S/R_4	72809	61.6485
S/R_5	72812	53.0418
S/R_6	72654	28.5446
S/R_7	72652	51.1978
S/R_8	72659	61.9984
S/R_9	72447	15.8834
S/R_10	72697	28.8973
SS_P	72819	101.889
SS_1	72805	104.414
SS_2	72837	194.171
SS_3	72803	165.488
SS_4	72853	202.465
SS_5	23829	5.05134
S/Y_P*	72889	155.625
S/Y_1	72857	94.5657
S/Y_2	72920	235.615
S/Y_3	72920	218.253
S/Y_4	72949	261.338
S/Y_5	72924	302.793
S/Y_6	72953	220.059
S/Y_7	72914	217.419
S/Y_8	72611	236.199
S/Y_9	72931	250.366
S/Y_10	72931	154.334
YY_P	72223	201.393
YY_1	72265	189.434
YY_2	72301	222.772
YY_3	72345	226.796
YY_4	72184	219.61
YY_5	72263	230.268
